# Supplementary material for: Ectomycorrhizal Colonization and Diversity in Relation to Tree Biomass and Nutrition in a Plantation of Transgenic Poplars with Modified Lignin Biosynthesis
Source: PLoS One. 2013 Mar 13;8(3):e59207. doi: 10.1371/journal.pone.0059207 (PMC3596300; doi:10.1371/journal.pone.0059207)
Supplement: Table S1 — Dissimilarity matrix of fungal communities based on the DGGE band pattern. (XLS) [file pone.0059207.s003.xls]

## Sheet: TabS1
Tab. S1:: Dissimilarity matrix of fungal communities based on the DGGE band pattern. 25 soil samples were collected in 2008. Jaccard distance was used for binary data as underlying distance for calculations.
sample	1	2	3	4	5	6	7	8	9	10	11	12	13	14	15	16	17	18	19	20	21	22	23	24	25
2	0.2
3	0.15	0.27
4	0.3	0.25	0.27
5	0.23	0.27	0.07	0.27
6	0.18	0.22	0.17	0.11	0.17
7	0.17	0.2	0.08	0.2	0.08	0.09
8	0.27	0.22	0.25	0.11	0.17	0.2	0.18
9	0.17	0.2	0.23	0.3	0.23	0.27	0.25	0.18
10	0.17	0.2	0.15	0.2	0.23	0.18	0.17	0.18	0.17
11	0.22	0.16	0.2	0.16	0.12	0.14	0.13	0.05	0.13	0.13
12	0.25	0.2	0.23	0.2	0.15	0.18	0.17	0.09	0.17	0.08	0.04
13	0.33	0.29	0.4	0.14	0.4	0.25	0.33	0.25	0.33	0.33	0.29	0.33
14	0.4	0.25	0.36	0.38	0.36	0.44	0.4	0.33	0.4	0.3	0.37	0.3	0.43
15	0.18	0.22	0.17	0.22	0.17	0.1	0.09	0.2	0.27	0.18	0.14	0.18	0.25	0.44
16	0.13	0.16	0.12	0.26	0.2	0.14	0.13	0.24	0.22	0.13	0.18	0.22	0.41	0.37	0.14
17	0.47	0.47	0.43	0.33	0.43	0.41	0.37	0.29	0.47	0.37	0.33	0.37	0.38	0.47	0.29	0.44
18	0.26	0.2	0.33	0.2	0.33	0.29	0.26	0.18	0.26	0.26	0.22	0.26	0.23	0.2	0.29	0.33	0.29
19	0.27	0.22	0.17	0.22	0.25	0.3	0.27	0.2	0.27	0.18	0.24	0.27	0.38	0.22	0.3	0.14	0.41	0.29
20	0.22	0.16	0.2	0.26	0.2	0.24	0.22	0.14	0.13	0.13	0.09	0.13	0.41	0.37	0.24	0.09	0.44	0.33	0.14
21	0.44	0.29	0.4	0.29	0.4	0.25	0.33	0.38	0.44	0.33	0.29	0.33	0.33	0.43	0.25	0.29	0.38	0.38	0.38	21	0.29
22	0.3	0.12	0.27	0.12	0.27	0.22	0.2	0.11	0.3	0.2	0.16	0.2	0.29	0.25	0.22	0.16	0.33	0.2	0.11	22	0.16	0.29
23	0.24	0.29	0.22	0.18	0.3	0.26	0.24	0.16	0.24	0.14	0.2	0.24	0.33	0.29	0.26	0.2	0.25	0.12	0.16	23	0.2	0.33	0.18
24	0.2	0.12	0.27	0.38	0.36	0.33	0.3	0.33	0.2	0.2	0.26	0.3	0.43	0.25	0.33	0.16	0.47	0.2	0.22	24	0.16	0.29	0.25	0.18
25	0.26	0.2	0.33	0.33	0.43	0.41	0.37	0.29	0.26	0.26	0.33	0.37	0.38	0.2	0.41	0.22	0.43	0.14	0.18	25	0.22	0.38	0.2	0.12	0.07
