# Supplementary material for: Ectomycorrhizal Colonization and Diversity in Relation to Tree Biomass and Nutrition in a Plantation of Transgenic Poplars with Modified Lignin Biosynthesis
Source: PLoS One. 2013 Mar 13;8(3):e59207. doi: 10.1371/journal.pone.0059207 (PMC3596300; doi:10.1371/journal.pone.0059207)
Supplement: Table S2 — Soluble amino acid, nitrate and ammonium concentrations in soil samples collected in 2008. (XLS) [file pone.0059207.s004.xls]

## Sheet: TabS2
Tab. S2: Soluble amino acid, nitrate and ammonium concentrations in soil samples collected in 2008. 25 soil samples were analyzed. Amino acids are presented in nmol / kg fresh soil and nitrate and ammonium are presented in µmol / kg fresh soil.
																			.
Sample	asp	glu	asn	ser	his	gln	gly	thr	arg	ala	gaba	tyr	val	ile	phe	leu	lys	NO3	NH4
1	18.5	5.3	1.6	47.9	4.9	2.7	51.8	8.7	4	24	5.1	4	7.8	15	52.5	5.5	8.1	55.5	15.6
2	88.6	27	7	184	24	4	210.8	64	13	123.4	6	28	30	38.1	31	37	33	127.2	17.8
3	13.8	4.9	1.8	33.1	4.8	2.5	37.1	8.9	8	21.4	5.9	4.9	9.8	21.4	39.2	2.9	4.5	81.6	13.8
4	22.1	4.3	2	46.6	8.3	1.2	45.8	9.4	4.1	16.6	5.9	5.1	11.1	31.3	43.3	4.1	11.1	100.2	17.9
5	15.3	4.9	1.9	28.7	1.6	0.7	31.8	6.1	2.7	14.9	6	5.1	7.9	20.9	36.8	5.8	5.1	94.3	15.3
6	19.4	5.6	1.2	51.9	2.1	1.3	44.4	10.8	4.6	17.6	6.5	5.6	9.8	29.6	35.9	4.3	5.1	96.5	15.2
7	121.9	36	17	372	54	10	534.4	94	37	262.1	7	25	59	44.5	31	47	46	70.6	15.3
8	64.6	20.5	2.2	109	12.1	3.1	131.1	39.3	7.8	83.8	5	16	16.4	47.2	64.6	16.3	22.3	42.2	20.5
9	16.6	3.9	1.5	49.2	2.8	0.6	48.9	9.2	0.5	19.2	3.3	4	5.3	27.7	41.5	5.1	6.7	108.6	13.1
10	9.4	2.3	0.9	17	0.7	0.5	26.4	3.8	1.7	13.4	3.4	6	5.4	23	37.1	4.1	4.9	74.9	13.1
11	56.4	11.9	2.2	103	1.8	1.3	112.9	26.1	1.1	77.8	6.7	13	15.6	50.5	65.3	15.9	15.2	51.3	23.9
12	16.3	4.2	1.1	35.5	1	0.8	42	8.1	2.4	24.2	4.1	5.9	13.7	32.8	41.1	6.4	6.1	47.9	13.2
13	10.5	2.7	1.2	15.5	1.2	0.4	25	5.5	2.1	11.3	3.8	4.2	5.2	4.1	9.1	5.2	4.7	90.3	13.8
14	36.3	9.3	3.2	52	4.1	1	85	19.5	2.8	41.4	4.7	11.7	10.5	36.1	45.9	12.6	14.7	67.7	16.5
15	30.1	10.6	3.1	80.6	3.6	1.5	72.8	17.7	5.5	37.2	6.6	8.1	12.5	41.3	57.3	9.9	11.7	193.5	18.1
16	8.9	3.4	1.6	22	6.6	0.6	23.1	4.5	1.8	13.9	7.1	6.3	8.6	31.6	47.3	3.6	4.3	65.5	21.5
17	14.8	4.4	1.7	31.3	9.8	0.7	31.5	6.2	2.1	11.6	4.5	3.5	17.4	38.8	58.8	3.1	6.7	31.2	22.8
18	17.1	3.6	1.2	42.7	1.3	1.4	41.9	11.1	2.3	33.3	4.9	5.7	12.2	49.3	72.2	6.4	4.7	119.9	28.4
19	15.4	3.6	1.1	28.4	11.7	2.5	29	5.4	3	19.1	4.6	6.5	8.6	31.4	49.3	2.9	3.8	65.4	15.3
20	22.5	5.3	2	61	5	2.4	54.2	11.3	1.7	27.5	7.3	8.3	6.9	32.8	46.8	4.9	6.6	117.8	17.5
21	25.7	8.6	4.6	89.5	3	3.1	64.7	17.4	5.6	35.5	16.4	7.4	17.2	46.6	65	10.1	8.4	49.6	22.1
22	25.9	6.4	3.7	97.3	11.1	3.5	71.7	22.6	6	33.8	3.6	5.7	9.4	32.4	37.3	7.5	7.8	61.7	13.7
23	25.7	9.5	5.2	95.7	11.2	4	63.6	22.3	31.3	37	5.2	4.3	9.4	30.4	40.8	8.6	9.2	73.8	11.8
24	52.5	26.7	8.3	107	10.3	5.9	124.6	50.8	13.1	74.3	6.9	13.6	18.9	32.4	32.1	18.3	14.8	60.9	8
25	43.7	13.4	6.6	85	10.1	2.2	92.5	30.9	5.4	54.1	25.7	9.6	14.6	35.2	36.8	12.4	10	115.7	10.7
