# Supplementary material for: Ectomycorrhizal Colonization and Diversity in Relation to Tree Biomass and Nutrition in a Plantation of Transgenic Poplars with Modified Lignin Biosynthesis
Source: PLoS One. 2013 Mar 13;8(3):e59207. doi: 10.1371/journal.pone.0059207 (PMC3596300; doi:10.1371/journal.pone.0059207)
Supplement: Table S3 — Relative abundance of fungal species detected on ectomycorrhizal root tips of P. × canescens and P. deltoides × nigra by morphotyping/ITS-sequencing. (XLS) [file pone.0059207.s005.xls]

## Sheet: TabS3 
Tab. S3: Relative abundance [%] of fungal species detected on ectomycorrhizal root tips of P. × canescens and P. deltoides × nigra by morphotyping/ITS-sequencing. In the transgenic poplar field sampling took place both years, in the commercial poplar field only in 2010. ACC: accession number. Field: 1 = transgenic field, 2 = commercial field. (-) indicates that this species was not found on roots…
									Relative abundance [%] 2009																								Relative abundance [%] 2010
		Best BLAST hit	Source	ACC	Length of sequence	Homology	Score	Field				CCR			CCR			COMT			COMT			CAD			CAD			CAD			WT			CCR			CCR			COMT			COMT			CAD
Species	ACC		database			[%]			WT			L5			L7			L9			L11			L18			L21			L22						L5			L7			L9			L11			L18
Cenococcum geophilum	JQ409285	Cenococcum geophilum	NCBI	HQ406817.1	857	96	1375	1 + 2	0	±	0	0	±	0	0	±	0	1.73371	±	0.230886	0	±	0	0	±	0	0	±	0	0	±	0	3.06676	±	0.330814	0.112994	±	0.0646914	0.182749	±	0.0822707	0.412797	±	0.123648	0.120337	±	0.0667602	0	±
Geopora cervina	JQ824878	Geopora cervina	NCBI	FM206386.1	547	99	989	1 + 2	-			-			-			-			-			-			-			-			0	±	0	0	±	0	0	±	0	9.13743	±	0.568747	1.37085	±	0.225327	0	±
Geopora sp.	JQ409286	Geopora sp. TAA 192232	NCBI	FM206420.1	489	99	878	1 + 2	-			-			-			-			-			-			-			-			12.7244	±	0.377336	5.13708	±	0.345695	20.484	±	0.463779	4.87013	±	0.308481	14.8401	±	0.437656	15.5596	±
Hebeloma sp.	JQ409279	Hebeloma sp.	UNITE	UDB001188	605	96	957	1	15.6173	±	0.520711	15.8785	±	0.75598	17.9252	±	0.509696	26.0983	±	0.553686	7.61991	±	0.326254	20.6845	±	0.415069	11.4525	±	0.35946	39.4718	±	0.873741	0	±	0	0	±	0	0	±	0	0	±	0	0	±	0	0	±
Hebeloma sacchariolens	JQ409280	Hebeloma sacchariolens	RSyst	UDB001188	605	96	957	1 + 2	0	±	0	0	±	0	0	±	0	0.784759	±	0.164076	0	±	0	0.545635	±	0.142157	0	±	0	0	±	0	2.74645	±	0.279539	0	±	0	1.00664	±	0.171659	0.0734637	±	0.0424231	0.0359583	±	0.0364937	0.218579	±
Inocybe cf. splendens	JQ824880	Inocybe cf. splendens EL21906	NCBI	FN550912.1	514	99	944	1 + 2	-			-			-			-			-			-			-			-			0	±	0	0	±	0	0.249288	±	0.0960879	0	±	0	1.55123	±	0.196067	0	±
Inocybe curvipes	JQ824879	Inocybe curvipes	UNITE	UDB000616	575	99	1104	1 + 2	-			-			-			-			-			-			-			-			0	±	0	0	±	0	0	±	0	0	±	0	0.660066	±	0.156355	0	±
Laccaria laccata	JQ824881	Laccaria laccata voucher	NCBI	JN021050.1	637	100	1107	1 + 2	-			-			-			-			-			-			-			-			0	±	0	0	±	0	0	±	0	2.08101	±	0.277623	0	±	0	0	±
Laccaria tortilis	JQ409281	Laccaria tortilis (Bolton) Cooke	UNITE	UDB001589	568	99	1126	1 + 2	0.192234	±	0.0843787	2.43697	±	0.362745	0	±	0	0.584795	±	0.14717	0	±	0	2.02513	±	0.270762	1.11887	±	0.167988	0	±	0	2.77778	±	0.32075	6.32293	±	0.394276	21.5248	±	0.512658	18.7917	±	0.570327	16.8502	±	0.394087	2.55681	±
Paxillus involutus	JQ409282	Paxillus involutus	RSyst	EU078741	638	99	1203	1 + 2	3.55007	±	0.316266	7.07841	±	0.517321	5.487	±	0.429782	10.9987	±	0.567093	12.4231	±	0.530455	2.25685	±	0.27747	1.1393	±	0.19266	2.55575	±	0.319788	0.804094	±	0.172572	0.898957	±	0.182468	4.63568	±	0.33753	3.13311	±	0.208568	12.0155	±	0.426881	3.95219	±
Peziza ostracoderma*	JQ409283	Peziza ostracoderma	NCBI	EU819461.1	657	99	1158	1 + 2	48.0057	±	0.576416	41.8493	±	0.912029	47.5679	±	0.772484	17.4589	±	0.586456	43.7651	±	0.630998	21.3924	±	0.650319	51.3794	±	0.490196	15.0375	±	0.707111	17.6689	±	0.58685	21.8976	±	0.459436	20.1568	±	0.467358	13.0855	±	0.372524	9.45308	±	0.323632	16.6804	±
Scleroderma bovista	JQ409289	Scleroderma bovista Fr.	UNITE	UDB002179	630	98	1205	1	-			-			-			-			-			-			-			-			0.10101	±	0.0611647	2.85088	±	0.264328	0	±	0	0	±	0	0	±	0	1.67627	±
Tomentella ellisii	JQ409290	Tomentella ellisii	NCBI	DQ068971.1	504	100	931	1 + 2	-			-			-			-			-			-			-			-			23.0045	±	0.537843	20.5538	±	0.53839	1.64715	±	0.202363	4.65176	±	0.347876	2.43019	±	0.230421	14.4072	±
Tuber sp.	JQ409291	Tuber sp. GMB-2010b	NCBI	HM485376.1	473	100	874	1	-			-			-			-			-			-			-			-			0	±	0	0	±	0	0	±	0	0	±	0	3.52391	±	0.361269	0	±
Tuber sp.	JQ824882	Tuber sp. NZT0251	NCBI	AM900418	562	100	1035	1 + 2	-			-			-			-			-			-			-			-			0.031211	±	0.0339994	0	±	0	0	±	0	1.63337	±	0.216713	0	±	0	0	±
Xerocomus ripariellus Redeuilh	JQ409296	Xerocomus ripariellus Redeuilh	UNITE	UDB000485	649	100	1287	1 + 2	-			-			-			-			-			-			-			-			3.06676	±	0.330814	0	±	0	0	±	0	0	±	0	0	±	0	0	±
uncultured ectomycorrhizal fungus	JQ824883	Uncultured fungus	NCBI	AJ875375.1	522	99	953	1 + 2	-			-			-			-			-			-			-			-			0	±	0	5.14558	±	0.426167	1.42544	±	0.229769	0	±	0	0.791082	±	0.171171	0	±
uncultured ectomycorrhizal fungus	JQ824884	Uncultured ectomycorrhizal fungus	NCBI	FJ013060.1	469	99	854	1	-			-			-			-			-			-			-			-			0	±	0	0	±	0	0.532481	±	0.140433	0	±	0	0	±	0	0	±
uncultured Peziza	JQ409295	uncultured Peziza	NCBI	GU969261.1	539	99	979	1 + 2	-			-			-			-			-			-			-			-			32.4575	±	0.545753	22.4785	±	0.440312	4.46151	±	0.209038	5.59864	±	0.363723	2.19571	±	0.199213	17.2854	±
uncultured Pezizales	JQ409284	uncultured Pezizales	NCBI	DQ469743.1	669	98	1112	1	32.4424	±	0.489702	32.7568	±	0.839619	29.0199	±	0.656013	42.3409	±	0.515476	35.3917	±	0.64048	52.7675	±	0.551038	33.8311	±	0.537795	42.9349	±	0.844374	-			-			-			-			-			-
unknown Ascomycota	JQ409287	Uncultured fungus	NCBI	EU555000.1	510	100	942	1 + 2	-			-			-			-			-			-			-			-			0.44331	±	0.0999761	7.79661	±	0.537367	5.96269	±	0.337462	15.3	±	0.511478	7.8398	±	0.38075	4.96181	±
unknown Ascomycota	JQ409288	uncultured fungus	NCBI	EU554730.1	539	100	996	1 + 2	-			-			-			-			-			-			-			-			0	±	0	0	±	0	0	±	0	1.73366	±	0.20682	0.683207	±	0.159072	6.66667	±
unknown Ascomycota	JQ409292	uncultured Ascomycota	NCBI	EU562601.1	522	97	883	1 + 2	-			-			-			-			-			-			-			-			0.190913	±	0.0840883	0.408497	±	0.123002	0	±	0	0	±	0	0	±	0	0	±
unknown Ascomycota	JQ409293	uncultured Ascomycota	NCBI	EU557319.1	544	99	992	1 + 2	-			-			-			-			-			-			-			-			0	±	0	0	±	0	3.60858	±	0.350927	6.88676	±	0.50504	1.97821	±	0.201319	7.84946	±
unknown Ascomycota	JQ409294	uncultured ectomycorrhizal fungus	NCBI	EF484931.1|	571	97	965	1	-			-			-			-			-			-			-			-			0.725468	±	0.163918	3.80055	±	0.312977	6.14672	±	0.438787	11.3973	±	0.587473	21.236	±	0.608493	7.46867	±
MT5		sequence not available						1	0.192234	±	0.0843787	0	±	0	0	±	0	0	±	0	0.800135	±	0.144157	0.328003	±	0.110219	1.07882	±	0.190056	0	±	0	-			-			-			-			-			-
MT13		sequence not available						1	-			-			-			-			-			-			-			-			0.190913	±	0.0840883	0	±	0	1.18821	±	0.19897	0	±	0	0	±	0	0	±
MT17		sequence not available						1	-			-			-			-			-			-			-			-			0	±	0	0.114943	±	0.0652467	0	±	0	0	±	0	0	±	0	0	±
MT30		sequence not available						1	-			-			-			-			-			-			-			-			0	±	0	2.48112	±	0.303139	0	±	0	0	±	0	0	±	0	0	±
MT33		sequence not available						1 + 2	-			-			-			-			-			-			-			-			0	±	0	0	±	0	0.475146	±	0.132657	1.10269	±	0.174727	0.179791	±	0.0816023	0.716846	±
MT38		sequence not available						1 + 2	-			-			-			-			-			-			-			-			0	±	0	0	±	0	0	±	0	0	±	0	0.251708	±	0.0965532	0	±
MT42		sequence not available						1 + 2	-			-			-			-			-			-			-			-			0	±	0	0	±	0	6.31214	±	0.390602	0.110742	±	0.0640434	1.99302	±	0.222643	0	±
[truncated: 16 more columns]
