# Supplementary material for: Ectomycorrhizal Colonization and Diversity in Relation to Tree Biomass and Nutrition in a Plantation of Transgenic Poplars with Modified Lignin Biosynthesis
Source: PLoS One. 2013 Mar 13;8(3):e59207. doi: 10.1371/journal.pone.0059207 (PMC3596300; doi:10.1371/journal.pone.0059207)
Supplement: Table S4 — Diversity indices of ectomycorrhizal fungal communities on the roots of P. × canescens in 2009 and 2010. (XLS) [file pone.0059207.s006.xls]

## Sheet: TabS4
Tab. S4: Diversity indices of ectomycorrhizal fungal communities on the roots of P. × canescens in 2009 and 2010. Rarefied diversity-Indices were calculated on the basis of 850 root tips per line. Cumulative diversity indices are presented.
	Shannon		Simpson		Spiecies richness		Evenness
Line	2009	2010	2009	2010	2009	2010	2009	2010
WT	1.18	1.82	0.65	0.79	6	13	0.66	0.7
CCR L5	1.33	2.05	0.69	0.84	5	13	0.83	0.79
CCR L7	1.17	2.18	0.66	0.85	4	17	0.84	0.77
COMT L9	1.43	2.38	0.72	0.89	7	16	0.74	0.85
COMT L11	1.24	2.3	0.67	0.87	5	19	0.77	0.78
CAD L18	1.18	2.23	0.61	0.88	7	13	0.61	0.87
CAD L21	1.06	1.79	0.59	0.8	6	11	0.59	0.75
CAD L22	1.08	1.39	0.63	0.7	4	7	0.78	0.72
Mean	1.20875	2.0175	0.6525	0.8275	5.5	13.625	0.7275	0.77875
SE	0.348855	0.937078	0.119762	0.177442	3.38062	10.5763	0.272868	0.165917
