# Supplementary material for: Ectomycorrhizal Colonization and Diversity in Relation to Tree Biomass and Nutrition in a Plantation of Transgenic Poplars with Modified Lignin Biosynthesis
Source: PLoS One. 2013 Mar 13;8(3):e59207. doi: 10.1371/journal.pone.0059207 (PMC3596300; doi:10.1371/journal.pone.0059207)
Supplement: Table S5 — Mean nutrient element concentrations in leaves, stem, and roots of wildtype and transgenic poplar ( P. × canescens ) genotypes. (XLS) [file pone.0059207.s007.xls]

## Sheet: TabS5
Table S5: Mean nutrient element concentrations in leaves , stem, and roots of wildtype and transgenic poplar (P. × canescens) genotypes.
Data indicate mean ± SE. F statistics and p-values are given for one-way ANOVA. Small letters indicated significant differences (TukeyHSD, p ≤ 0.05). C concentration was analyzed by Kruskal-Wallis rank sum test and Mann-Whitney U-Test (p ≤ 0.05). Diffrent letters indicate significant diffrences.
all element concentrations in mg g-1 dry mass. Leaves and roots were harvested for analysis in October 2009, and stems in March 2010.
leaves	P [mg/g]				C [mg/g]				N [mg/g]				S [mg/g]				K [mg/g]				Ca [mg/g]				Mg [mg/g]				Mn [mg/g]				Fe [mg/g]				δ C13
	F= 3.72				Chi2= 3.46				F= 5.47				F= 14.83				F= 5.54				F= 0.68				F= 1.91				F= 2.65				F= 0.73				F= 1.84
	P= 0.002				p= 0.003				p< 0.0001				p= 0.038				p< 0.0001				p= 0.690				p= 0.082				p= 0.018				p= 0.645				p= 0.095
WT	2.83248	±	0.169615	ab	496.148	±	2.21638	ab	25.4786	±	0.898093	abc	1.87534	±	0.23889	ab	11.5437	±	0.306539	abc	7.22046	±	0.394133	a	1.46388	±	0.0247073	a	0.0690469	±	0.00654775	a	0.0904764	±	0.00545963	a	-28.025	±	0.194643	a
CCR L5	3.02096	±	0.0919003	ab	493.286	±	3.07629	a	28.4864	±	0.700251	a	2.05606	±	0.215714	a	11.9015	±	0.299231	ab	7.17714	±	0.660739	a	1.49744	±	0.0637067	a	0.0896878	±	0.00591081	a	0.0903887	±	0.00567617	a	-27.3562	±	0.31996	a
CCR L7	2.61556	±	0.123689	ab	494.398	±	1.29627	a	23.6324	±	0.782652	b	1.6054	±	0.0310727	ab	10.6154	±	0.271299	ac	7.89778	±	0.72961	a	1.47533	±	0.0391539	a	0.080865	±	0.0088085	a	0.0985963	±	0.00973801	a	-27.4699	±	0.257606	a
COMT L9	2.776	±	0.178766	ab	499.395	±	1.23561	ab	25.4884	±	0.389153	abc	1.60673	±	0.0503268	ab	12.2728	±	0.470959	ab	7.54095	±	0.500438	a	1.57465	±	0.063513	a	0.0792152	±	0.0056614	a	0.103636	±	0.0121652	a	-27.255	±	0.212382	a
COMT L11	3.18427	±	0.177997	a	497.447	±	1.24205	ab	26.492	±	0.560759	abc	1.64711	±	0.0375657	ab	12.0491	±	0.531528	ab	7.46622	±	0.463971	a	1.65513	±	0.0608693	a	0.106456	±	0.00381417	a	0.090744	±	0.0079901	a	-27.3034	±	0.267113	a
CAD L181	2.7487	±	0.058987	ab	496.852	±	1.12016	ab	25.0526	±	0.734014	bc	1.59504	±	0.0312846	ab	12.6134	±	0.517483	b	7.24386	±	0.406605	a	1.48639	±	0.0474327	a	0.075643	±	0.00887443	a	0.0903768	±	0.00487378	a	-27.354	±	0.295578	a
CAD L21	3.16922	±	0.139299	a	500.149	±	0.942013	ab	28.1694	±	1.15028	ac	1.7061	±	0.0484543	ab	12.5516	±	0.442238	b	7.61839	±	0.402878	a	1.45263	±	0.0511078	a	0.100021	±	0.0133642	a	0.0862308	±	0.00688218	a	-27.1269	±	0.21421	a
CAD L22	2.46102	±	0.0630701	b	502.66	±	0.901224	b	23.8899	±	0.517548	b	1.55538	±	0.0183679	b	9.92568	±	0.339099	c	8.38706	±	0.23785	a	1.46088	±	0.0413275	a	0.0707925	±	0.00773229	a	0.0830468	±	0.00335275	a	-26.8477	±	0.0843155	a
stem	P [mg/g]				C [mg/g]				N [mg/g]				S [mg/g]				K [mg/g]				Ca [mg/g]				Mg [mg/g]				Mn [mg/g]				Fe [mg/g]				δ C13
	F= 2.83				Chi2= 13.50				F= 13.62				F= 10.90				F= 7.18				F= 10.46				F= 3.61				F= 7.11				F= 2.15				F= 0.676
	p= 0.019				p= 0.036				p< 0.0001				p< 0.0001				p< 0.0001				p< 0.0001				p= 0.005				p< 0.0001				p= 0.064				p= 0.670
WT	1.13881	±	0.0205719	b	462.72	±	2.16955	a	8.22557	±	0.31406	bd	0.364004	±	0.0104198	c	2.65318	±	0.0319302	c	6.24569	±	0.294955	ab	0.700366	±	0.0186639	b	0.0158819	±	0.000957584	b	0.0474713	±	0.00132835	a	-24.743	±	0.136114	a
CCR L5	1.22071	±	0.0516462	ab	459.039	±	1.28016	a	9.2223	±	0.314574	ab	0.480512	±	0.0283674	bd	3.35199	±	0.15152	a	7.46644	±	0.265548	ab	0.742807	±	0.0294213	ab	0.0198902	±	0.00160256	ab	0.054083	±	0.010044	a	-25.0247	±	0.12913	a
CCR L7	1.31807	±	0.0550895	ab	451.224	±	3.22219	a	9.88142	±	0.222324	ac	0.573293	±	0.0169767	abd	3.4216	±	0.172526	a	9.62335	±	0.426113	c	0.851142	±	0.0463706	a	0.0268257	±	0.00315921	c	0.0461528	±	0.00433037	a	-24.906	±	0.0774544	a
COMT L9	1.21522	±	0.0530278	ab	459.153	±	0.708298	a	8.20352	±	0.229388	bd	0.419971	±	0.0260249	cd	2.81344	±	0.121929	bc	6.1061	±	0.416799	a	0.685849	±	0.0364384	b	0.0189142	±	0.000794463	ab	0.0566862	±	0.0079181	a	-24.9903	±	0.138353	a
COMT L11	1.25011	±	0.0290262	ab	456.294	±	0.590828	a	8.19692	±	0.196876	bd	0.453031	±	0.0166229	cd	2.96265	±	0.0775085	abc	7.6544	±	0.213145	b	0.792144	±	0.0216422	ab	0.023574	±	0.00116217	ac	0.0442113	±	0.00310719	a	-24.9637	±	0.0889772	a
CAD L181	NA	±	NA	NA	NA	±	NA	NA	NA	±	NA	NA	NA	±	NA	NA	NA	±	NA	NA	NA	±	NA	NA	NA	±	NA	NA	NA	±	NA	NA	NA	±	NA	NA	NA	±	NA	NA
CAD L21	1.32976	±	0.0500322	a	458.457	±	0.983321	a	8.05524	±	0.210208	d	0.443696	±	0.0277634	cd	2.77159	±	0.085761	bc	6.63836	±	0.447164	ab	0.788417	±	0.0325326	ab	0.0170464	±	0.000894691	b	0.0649053	±	0.00865641	a	-24.9294	±	0.0975328	a
CAD L22	1.36971	±	0.0560384	a	459.383	±	0.352953	a	10.7571	±	0.263262	c	0.646657	±	0.0119629	a	3.24496	±	0.122129	ab	7.59077	±	0.0731385	ab	0.801631	±	0.0136812	ab	0.0158676	±	0.00113352	b	0.0831243	±	0.0182242	a	-24.8912	±	0.071155	a
roots	P [mg/g]				C [mg/g]				N [mg/g]				S [mg/g]				K [mg/g]				Ca [mg/g]				Mg [mg/g]				Mn [mg/g]				Fe [mg/g]
	F= 6.87				F= 1.32				F= 0.59				F= 2.06				F= 2.23				F= 3.01				F= 1.86				F= 2.60				F= 1.18
	p< 0.0001				p= 0.258				p= 0.760				p= 0.061				p= 0.043				p= 0.009				p= 0.091				p= 0.020				p= 0.326
WT	1.56067	±	0.0705674	ab	429.159	±	3.76507	a	8.71691	±	1.10385	a	1.03556	±	0.102176	a	5.36883	±	0.23832	ab	7.78287		0.241489	a	1.17079	±	0.11787	a	0.114066	±	0.0207438	ab	2.37193	±	0.460841	a
CCR L5	1.82472	±	0.0658921	abc	418.172	±	4.75021	a	9.44443	±	1.10314	a	1.1707	±	0.110223	a	5.83408	±	0.249418	ab	8.56468		0.526901	a	1.32289	±	0.106294	a	0.121029	±	0.0160618	ab	2.47638	±	0.336259	a
CCR L7	1.7598	±	0.0941959	ab	433.813	±	6.3728	a	9.79396	±	0.618449	a	1.20196	±	0.0718498	a	6.03614	±	0.35712	ab	9.32854		0.317516	a	1.24766	±	0.0929469	a	0.106889	±	0.00998532	a	1.88328	±	0.200892	a
COMT L9	1.61819	±	0.0939124	ab	417.123	±	8.44019	a	10.185	±	0.537978	a	1.20461	±	0.0561403	a	5.54185	±	0.306268	ab	7.72741		0.292322	a	1.27654	±	0.0800525	a	0.181584	±	0.0189458	ab	2.93616	±	0.337374	a
COMT L11	1.49877	±	0.0300924	a	429.196	±	5.15934	a	10.2831	±	0.969285	a	1.00901	±	0.0663387	a	5.50229	±	0.28567	ab	7.86542		0.345036	a	1.11288	±	0.093637	a	0.132595	±	0.022807	ab	2.22906	±	0.445613	a
CAD L181	1.931	±	0.111449	bc	438.245	±	3.35761	a	11.2008	±	0.94909	a	1.3631	±	0.104158	a	6.05396	±	0.437966	ab	8.85059		0.478671	a	1.54007	±	0.125099	a	0.155125	±	0.021746	ab	3.05443	±	0.392184	a
CAD L21	2.15562	±	0.0937592	c	429.684	±	7.18292	a	10.1687	±	1.10593	a	1.33212	±	0.113063	a	6.67182	±	0.398575	a	9.10701		0.171272	a	1.50574	±	0.155763	a	0.210364	±	0.0376242	b	3.00642	±	0.407317	a
CAD L22	1.60857	±	0.0882212	ab	430.494	±	8.94292	a	9.55517	±	1.06993	a	1.08914	±	0.0722759	a	5.0629	±	0.330141	b	8.91187		0.457529	a	1.2639	±	0.0841476	a	0.130999	±	0.0221955	ab	2.89891	±	0.534798	a
